# Supplementary material for: Highly Effective Crosslinker for Redox-Sensitive Gene Carriers
Source: Hindawi journal article supplement (doi:10.1155/2021/5635981), 2021-12-14
Supplement: f1 [file 5635981.f1.docx]

**Supplementary data**

**Highly Effective Crosslinker for Redox Sensitive Gene Carriers**

Lin Lin1,2,3, Jie Chen1,2,3, Yingying Hu1,2, Huapan Fang1,4, Kui Wang1,2,*, Huayu Tian1,2,3,*, and Xuesi Chen1,2,3

1University of Science and Technology of China, Hefei, Anhui 230027, China

2Key Laboratory of Polymer Ecomaterials, Changchun Institute of Applied Chemistry, Chinese Academy of Sciences, Changchun 130022, China

3Jilin Biomedical Polymers Engineering Laboratory, Changchun 130022, China

4Institute of Functional Nano and Soft Materials (FUNSOM), Jiangsu Key Laboratory for Carbon Based Functional Materials & Devices, Soochow University, Suzhou, 215123, Jiangsu, China

Corresponding authors, Email: thy@ciac.ac.cn

   Email: kuiwang@cqu.edu.cn


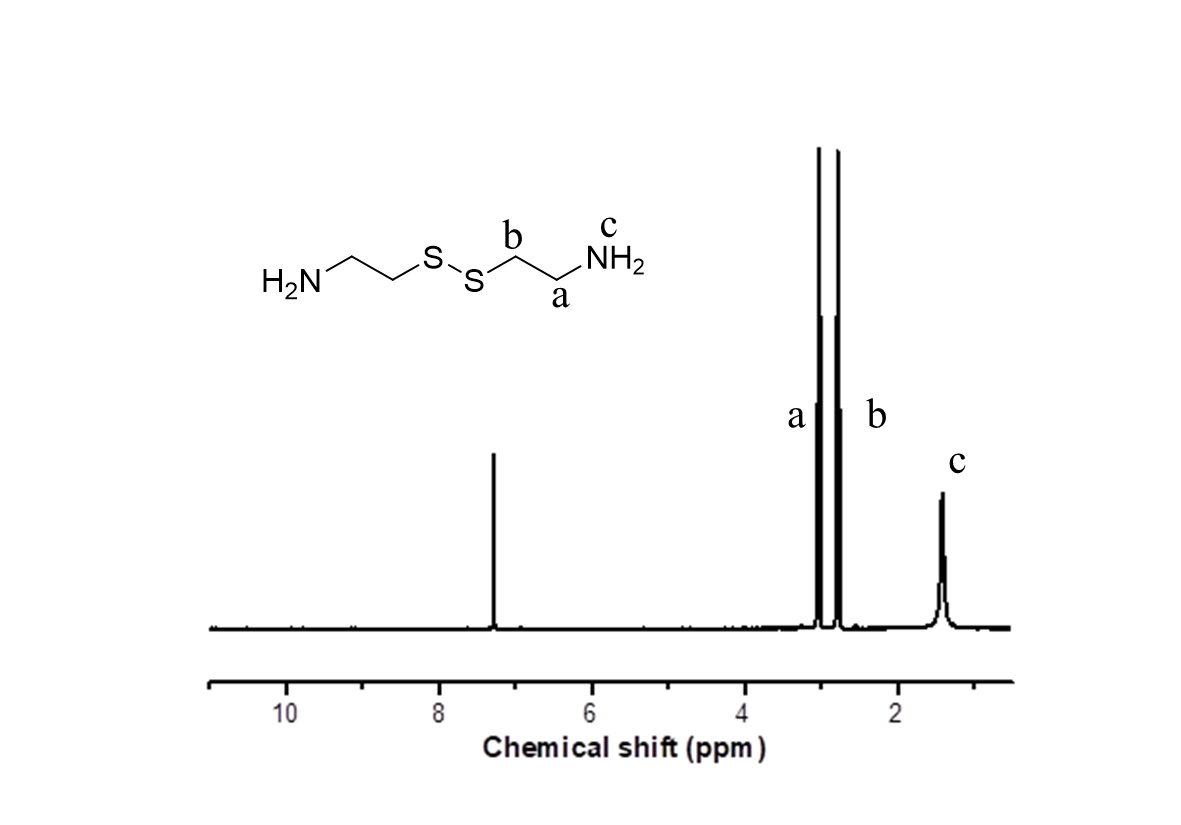


**Fig. S1** The 1H-NMR spectrum of cystamine.


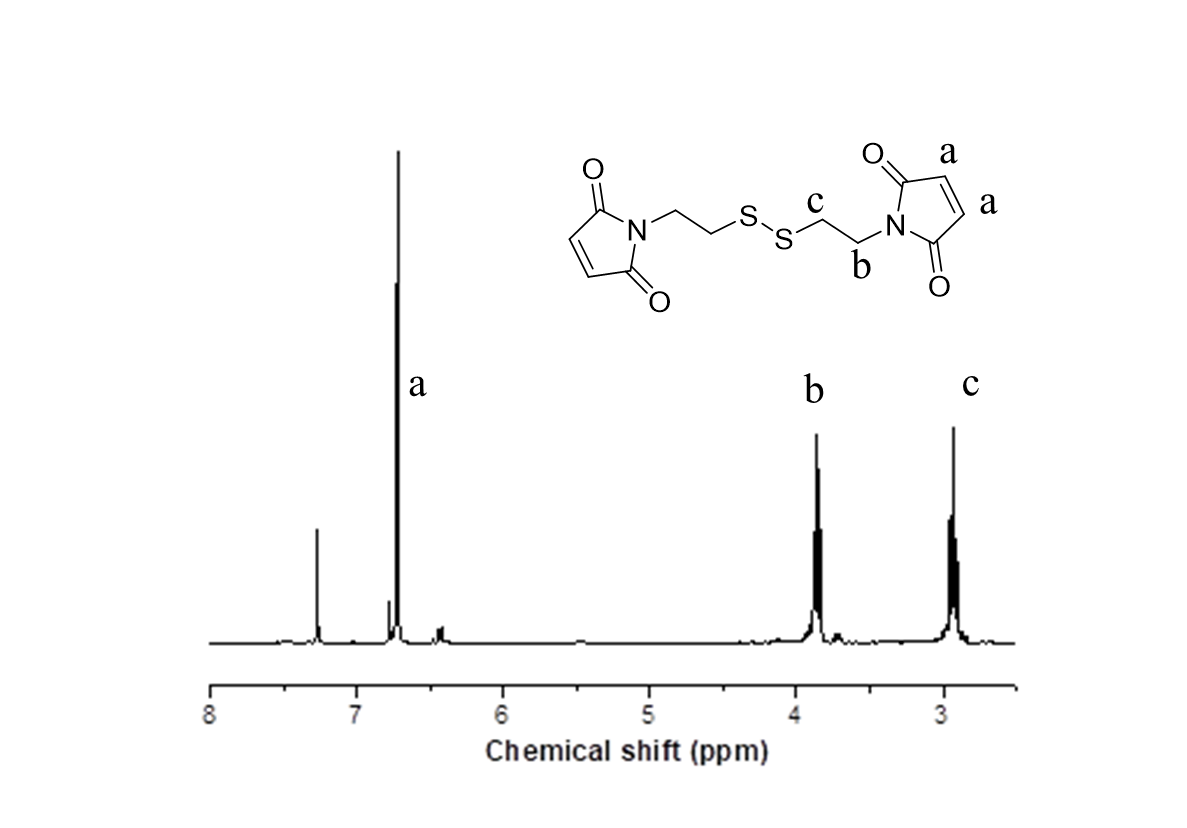


**Fig. S2** The 1H-NMR spectrum of DTME.


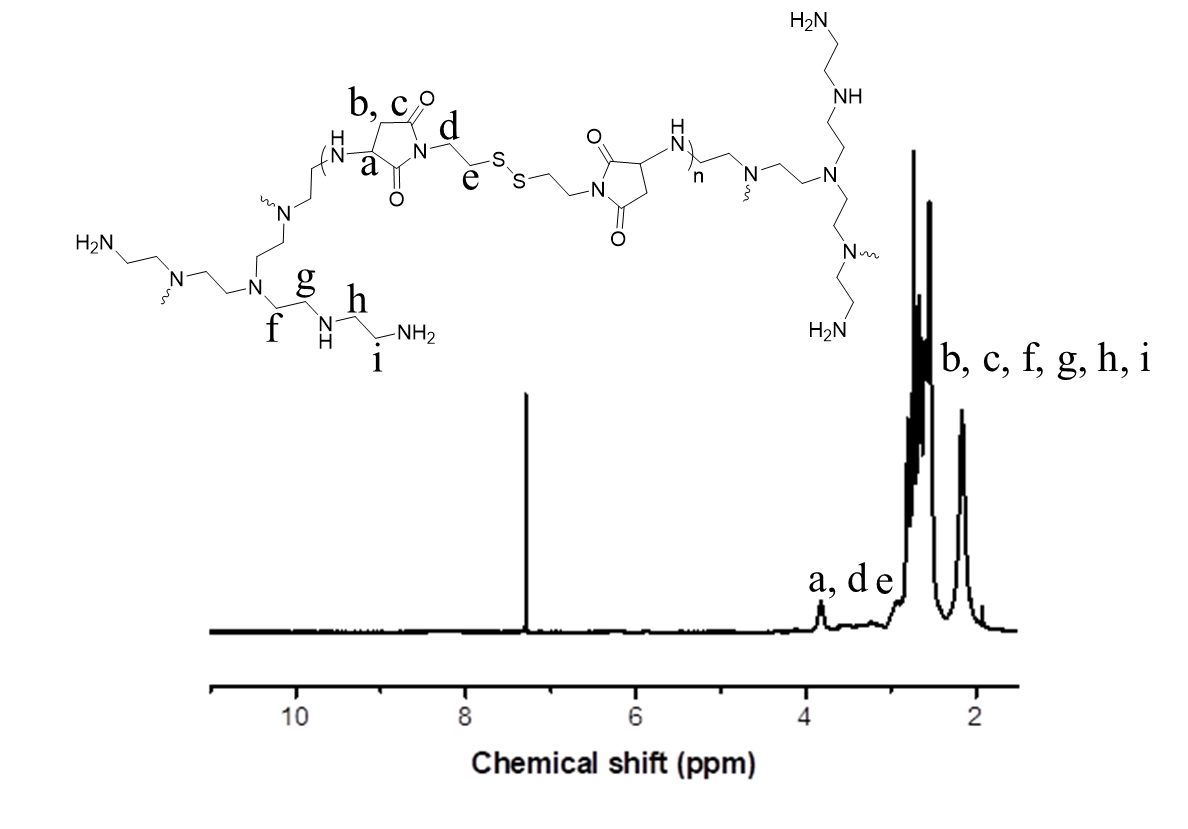


**Fig. S3** The 1H-NMR spectrum of CS-PEI1.8k.


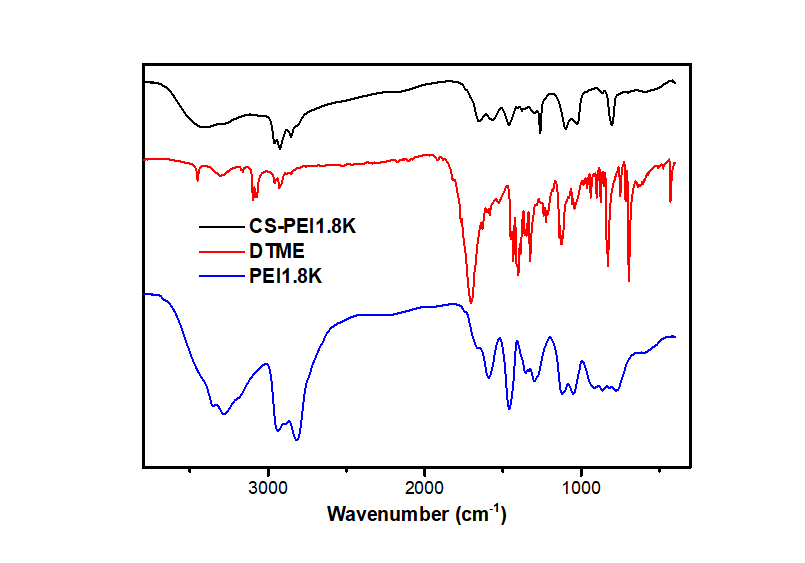


**Fig. S4** The FTIR spectrum of CS-PEI1.8K, DTME, and PEI1.8k.


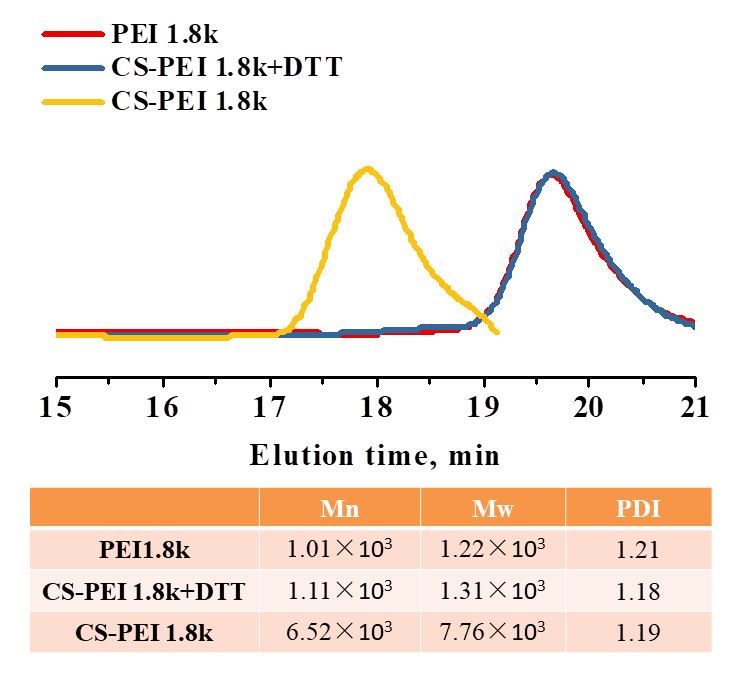


**Fig. S5** Gel permeation chromatography results of CS-PEI1.8k before and after adding DTT.


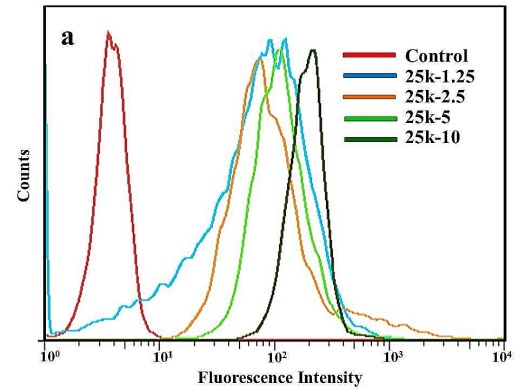

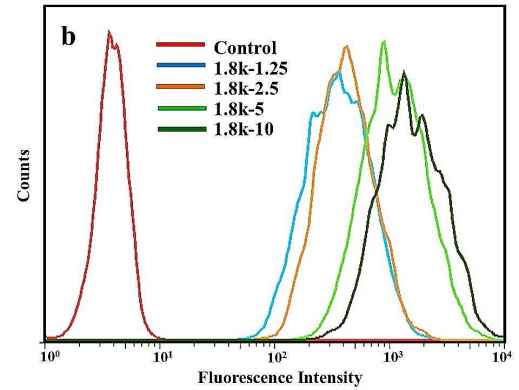


**Fig. S6** Cell internalization of PEI25k (a) and PEI1.8k (b) at different weight rates detected by flow cytometry in HeLa cells.


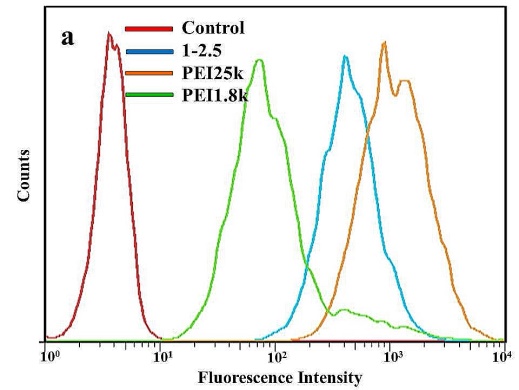

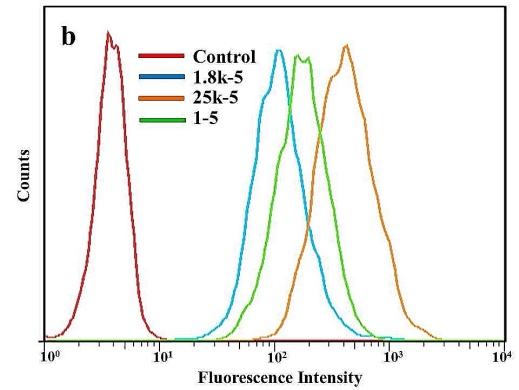


**Fig. S7** Cell internalization of PEI25k, PEI1.8k, and CS-PEI1.8k at different weight rates of 2.5 (a) and 5 (b) detected by flow cytometry in HeLa cells.
